# Supplementary material for: The rapid replacement of the Delta variant by Omicron (B.1.1.529) in England
Source: PubMed Central journal article supplement (PMC9097877; doi:10.1126/scitranslmed.abo5395), 2022-05-03
Supplement: scitranslmed.abo5395_sm.pdf [file scitranslmed.abo5395_sm.pdf]

Supplementary Materials for

**The rapid replacement of the Delta variant by Omicron (B.1.1.529) in England**

Robert S. Paton, Christopher E. Overton, Thomas Ward\*

\*Corresponding author: [tom.ward@ukhsa.gov.uk](mailto:tom.ward@ukhsa.gov.uk)

DOI: 10.1126/scitranslmed.abo5395

**The PDF file includes:**

Figs. S1 to S11  
Table S1

**Other Supplementary Material for this manuscript includes the following:**

MDAR Reproducibility Checklist

**Supplementary Material for:**

**THE RAPID REPLACEMENT OF THE DELTA VARIANT BY OMICRON (B.1.1.529) IN ENGLAND**

Robert S. Paton, Christopher E. Overton & Thomas Ward\*

Data Science and Analytics, UK Health Security Agency, Nobel House, London, UK, SW1P 3JR

\*Corresponding author: [tom.ward@ukhsa.gov.uk](mailto:tom.ward@ukhsa.gov.uk)

## Supplementary Figures

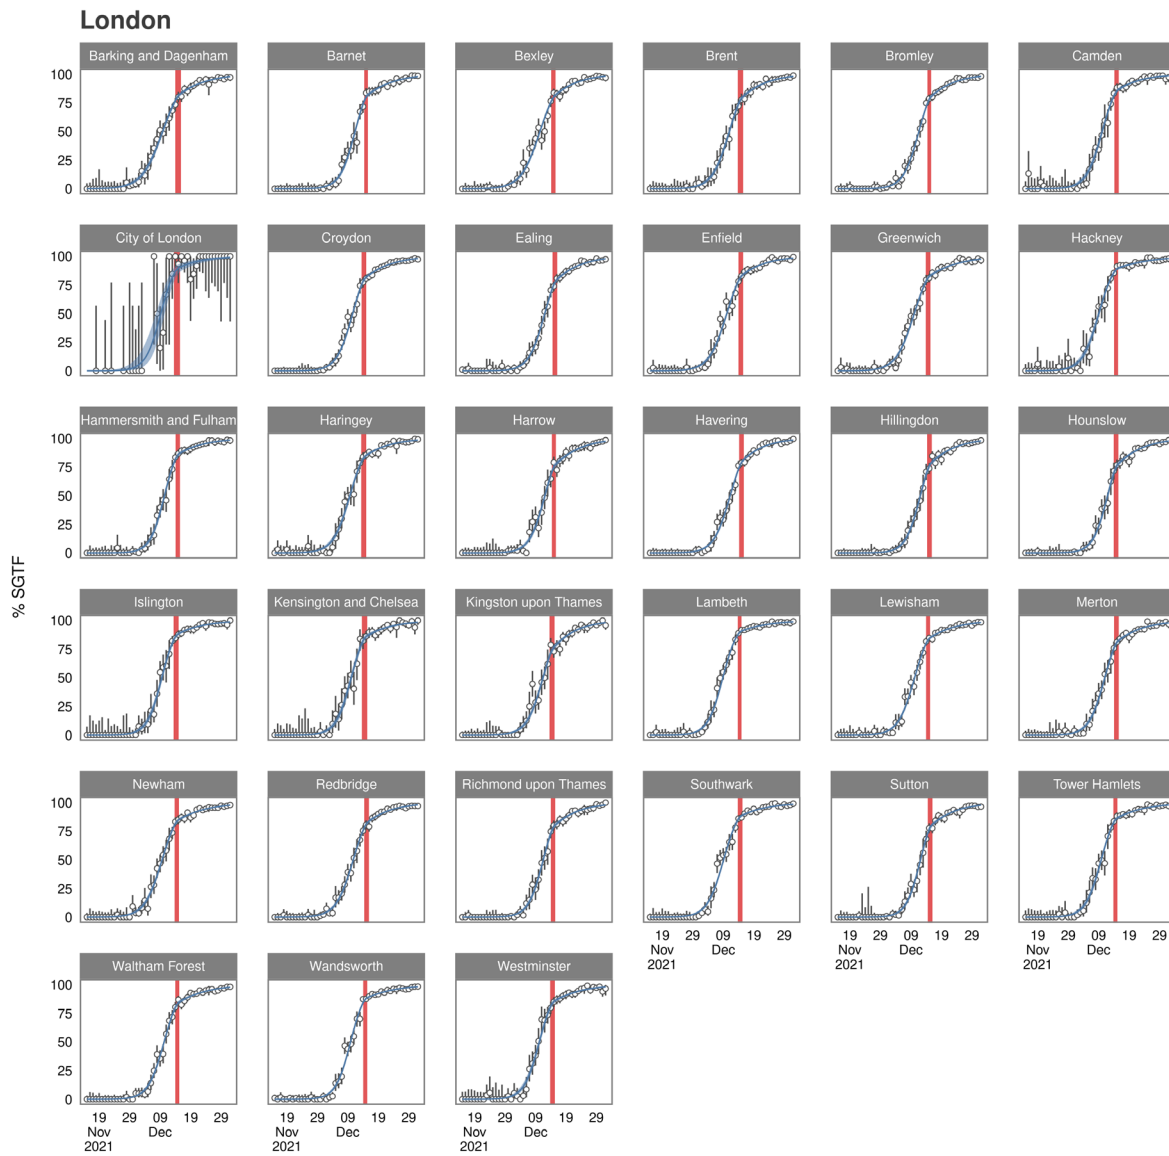

Figure S1: Model fit for London LTAs.

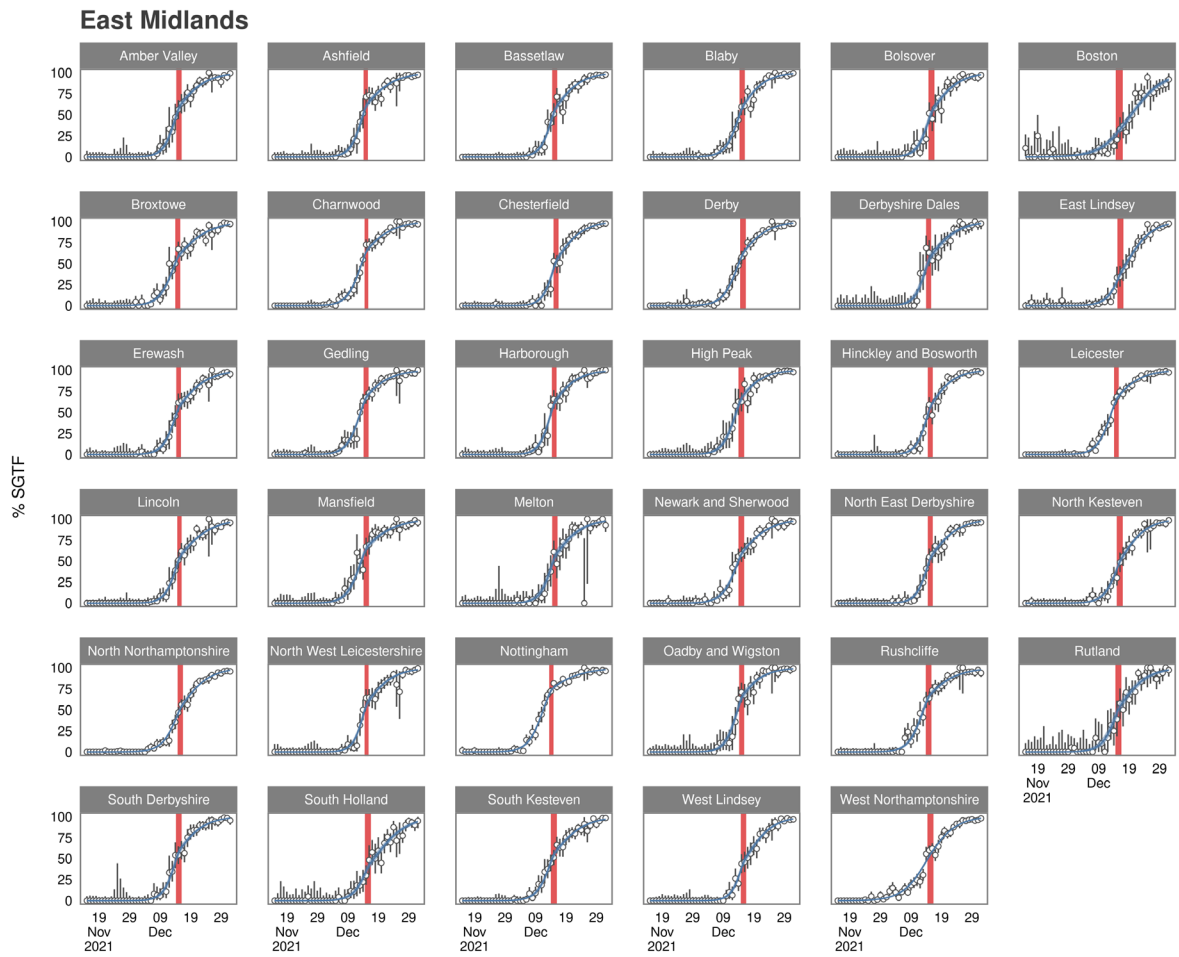

Figure S2: Model fit for LTLAs in the East Midlands.

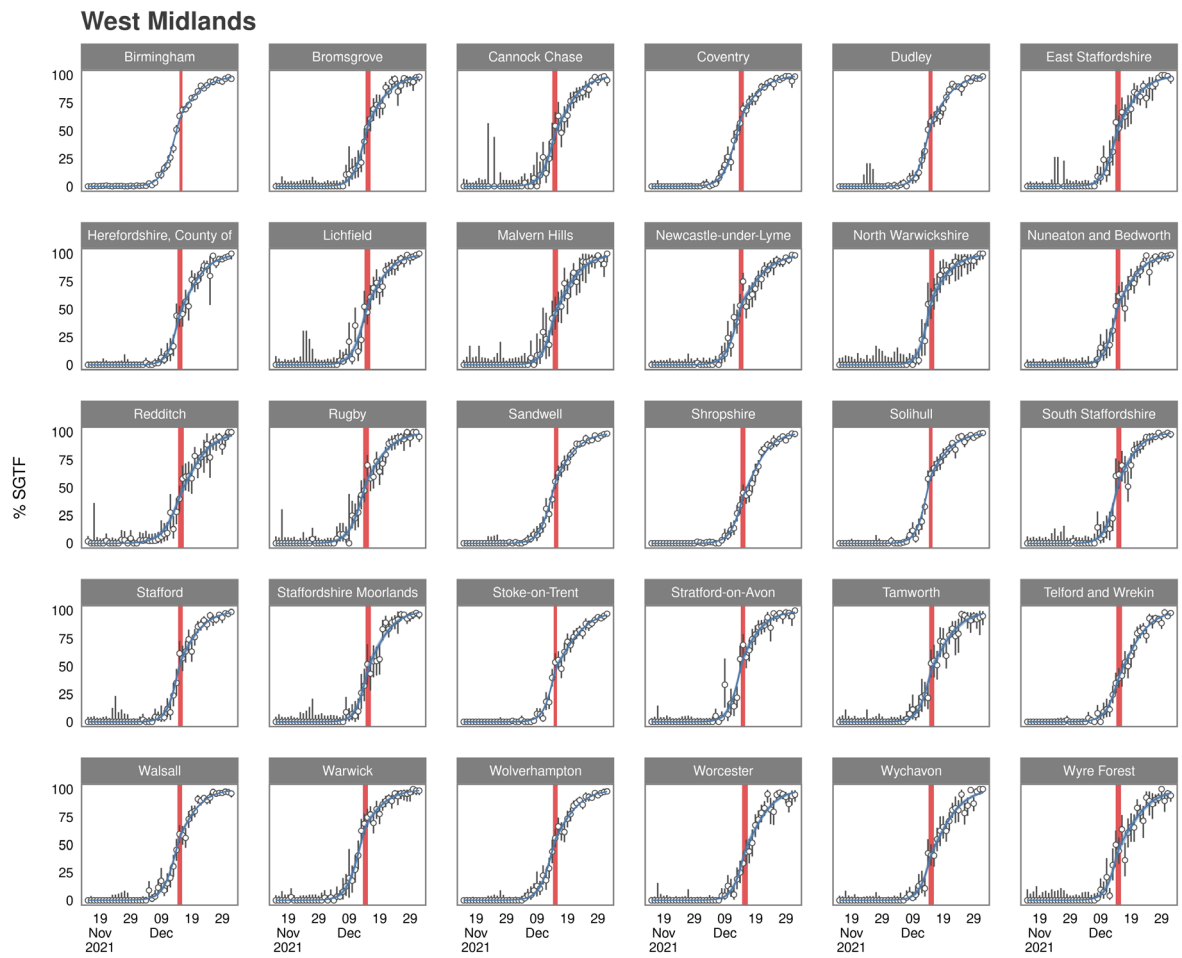

**Figure S3: Model fit for LTLAs in the West Midlands.**

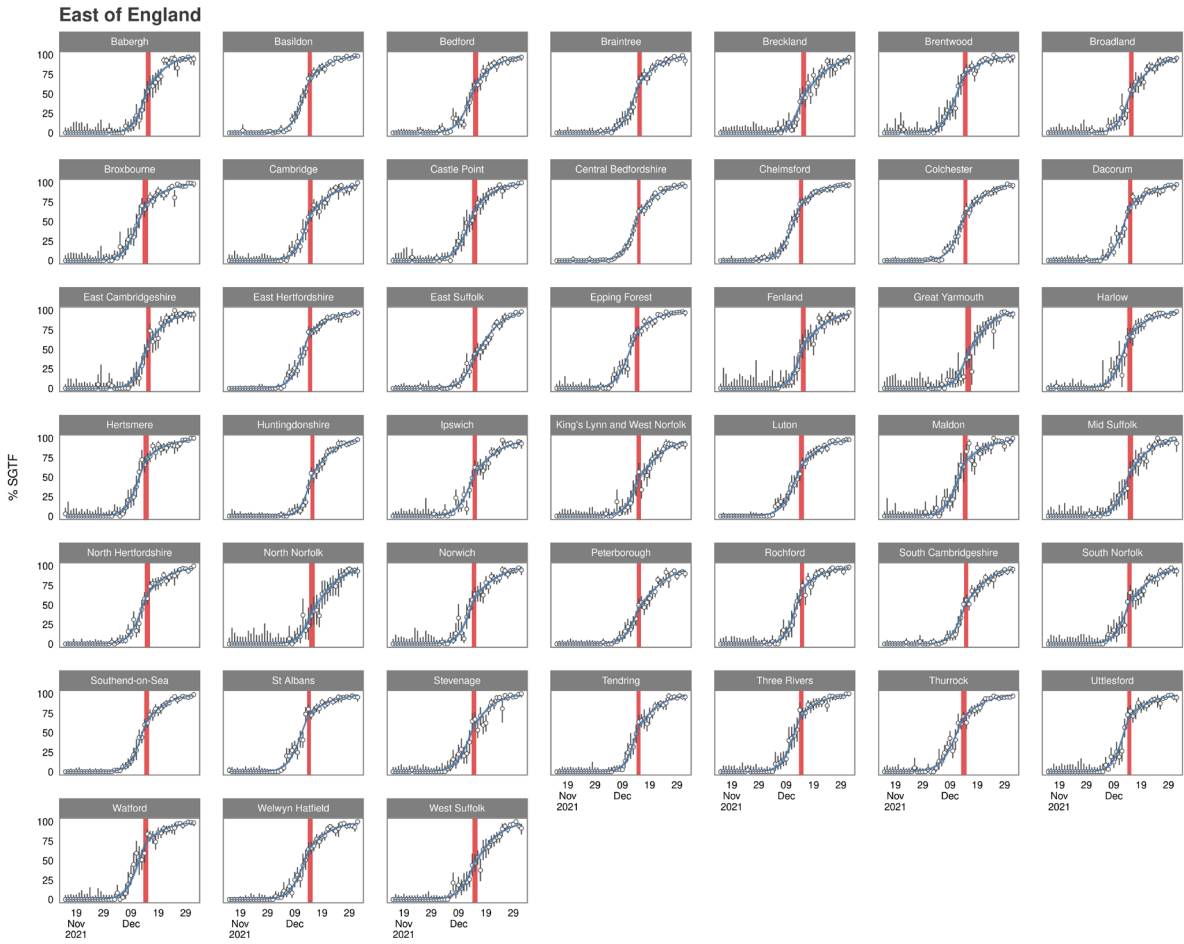

**Figure S4: Model fit for LTAs in the East of England.**

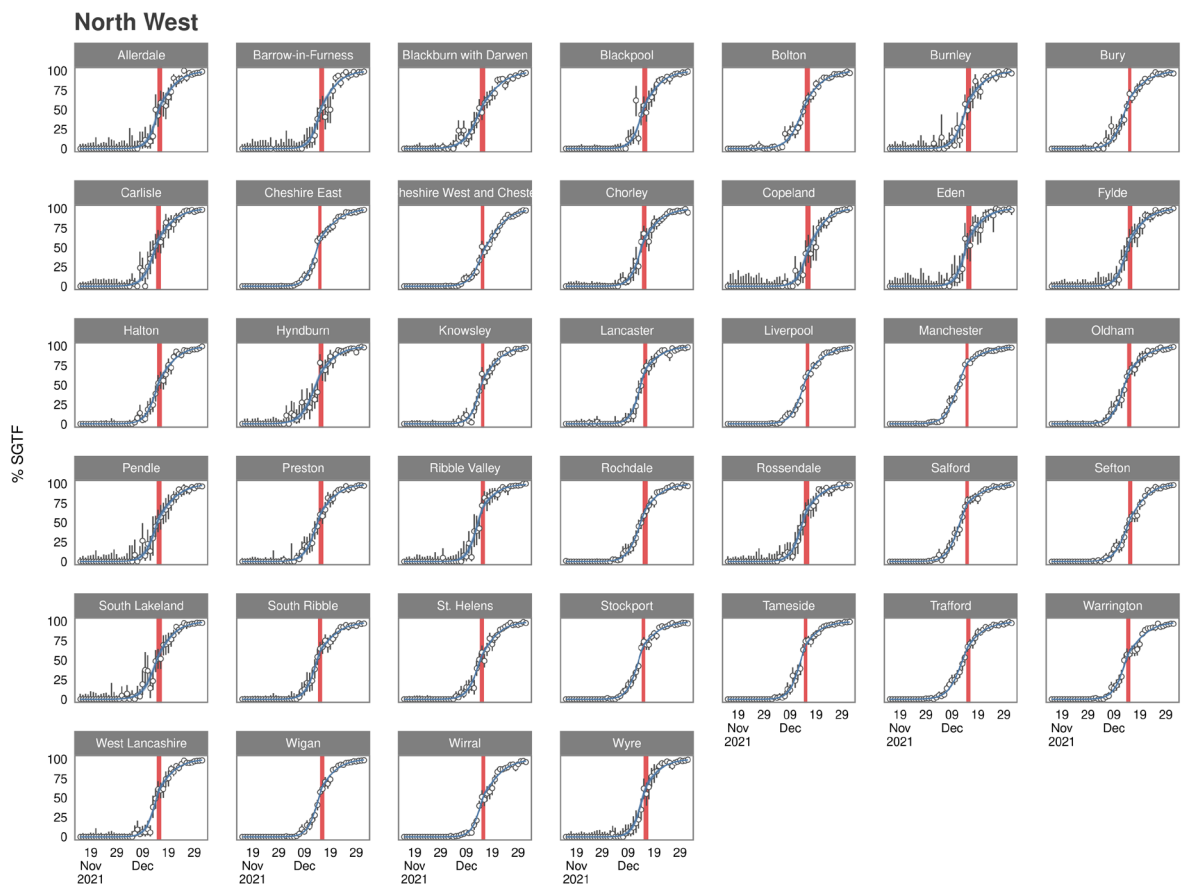

**Figure S5: Model fit for LTLAs in the North West.**

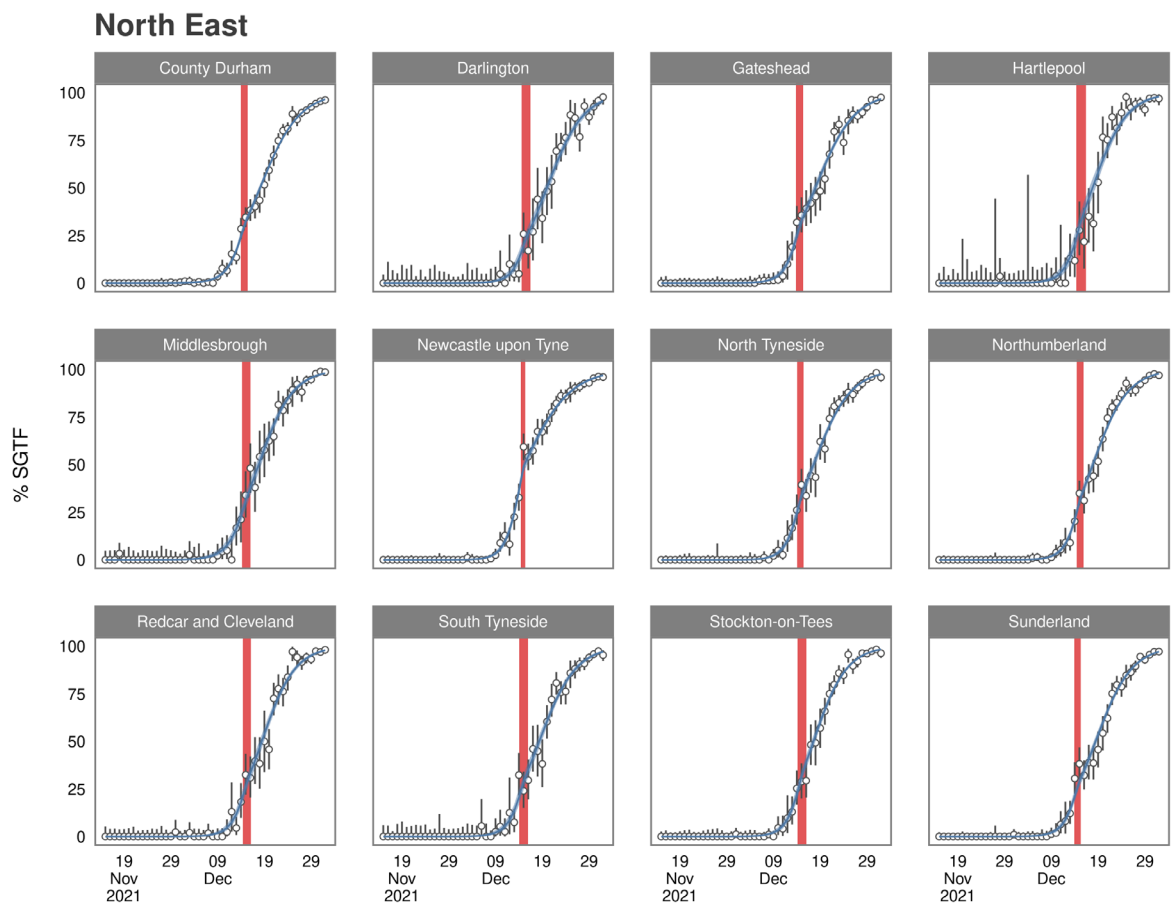

**Figure S6: Model fit for LTLAs in the North East.**



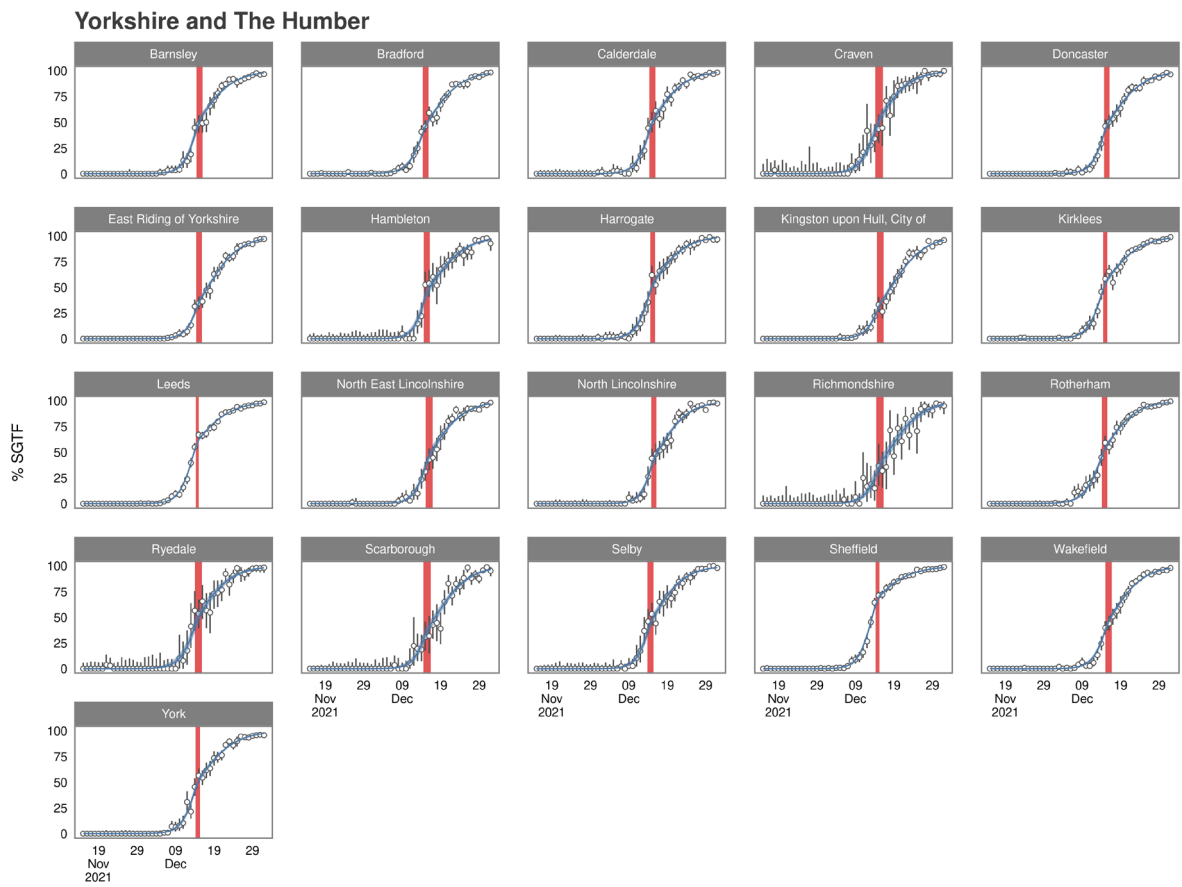

**Figure S7: Model fit for LTLAs in Yorkshire and the Humber.**

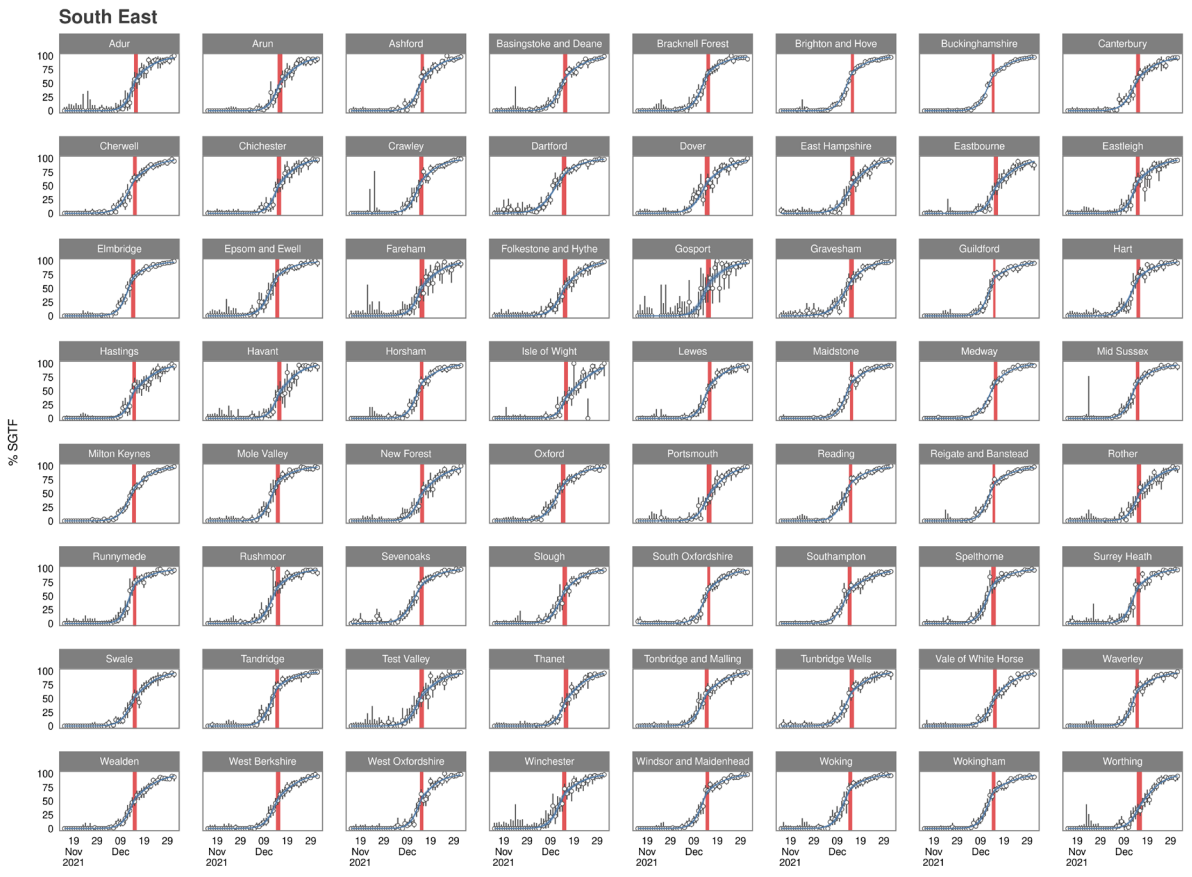

**Figure S8: Model fit for LTAs in South East.**

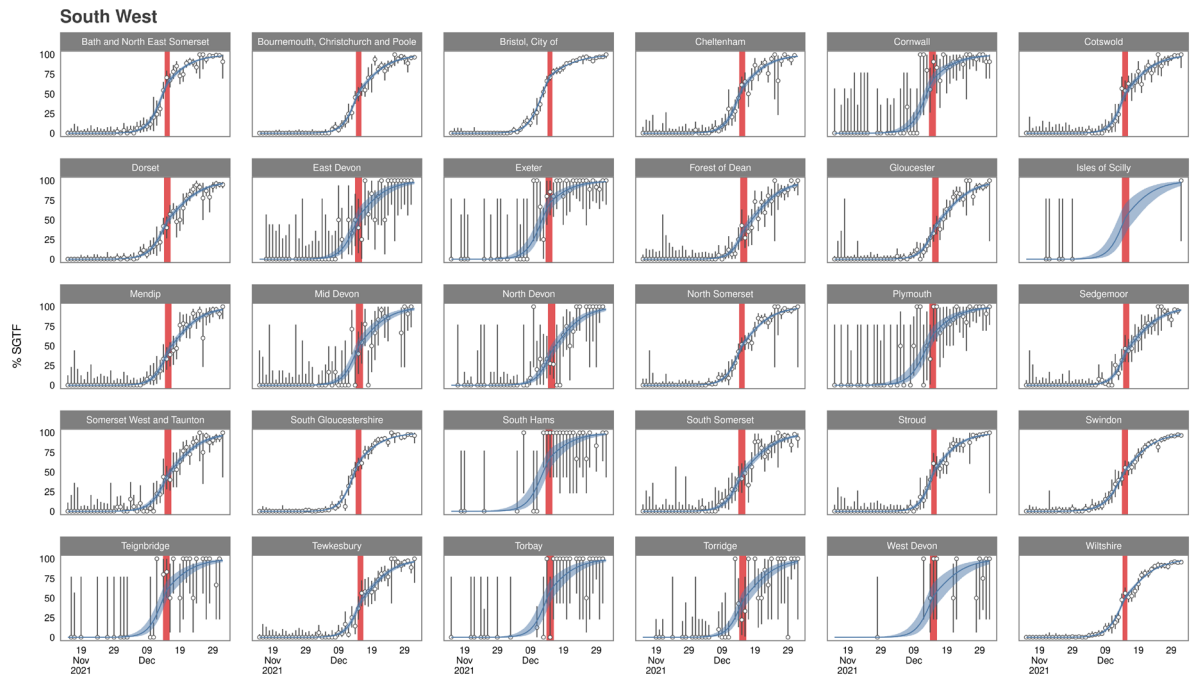

**Figure S9: Model fit for LTLAs in South West.**

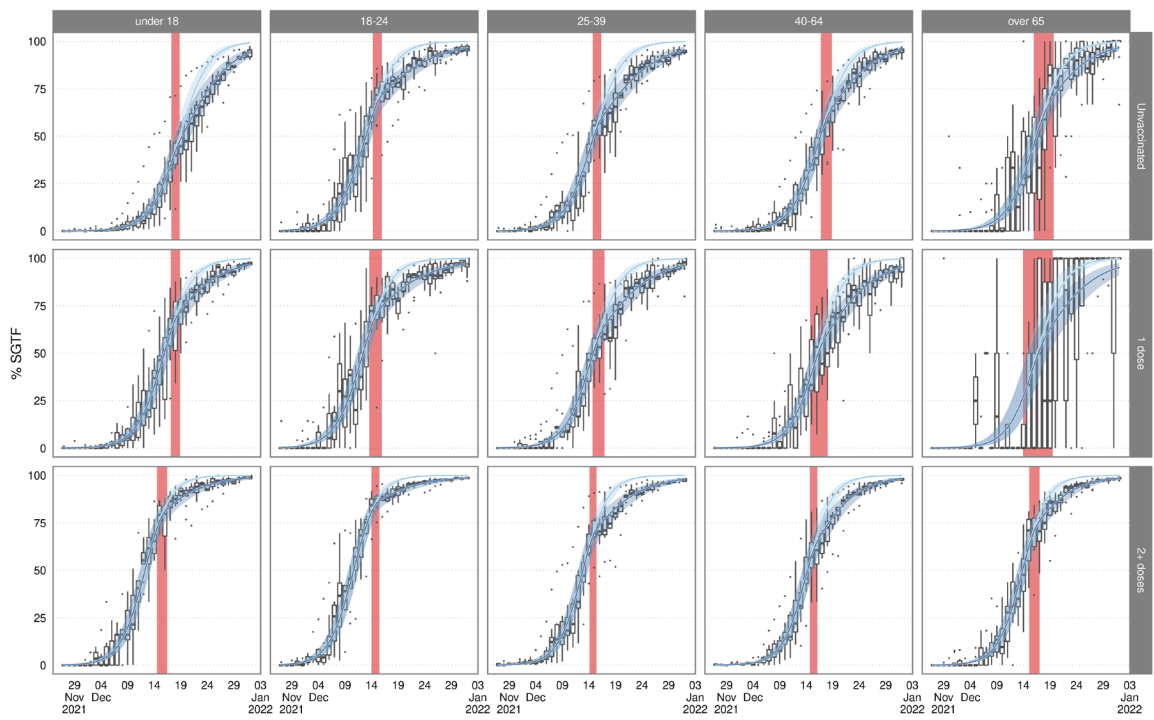

**Figure S10: Model fit for the vaccine-stratified model, by age group.** Boxplots show the regional proportions within each vaccine/age group.

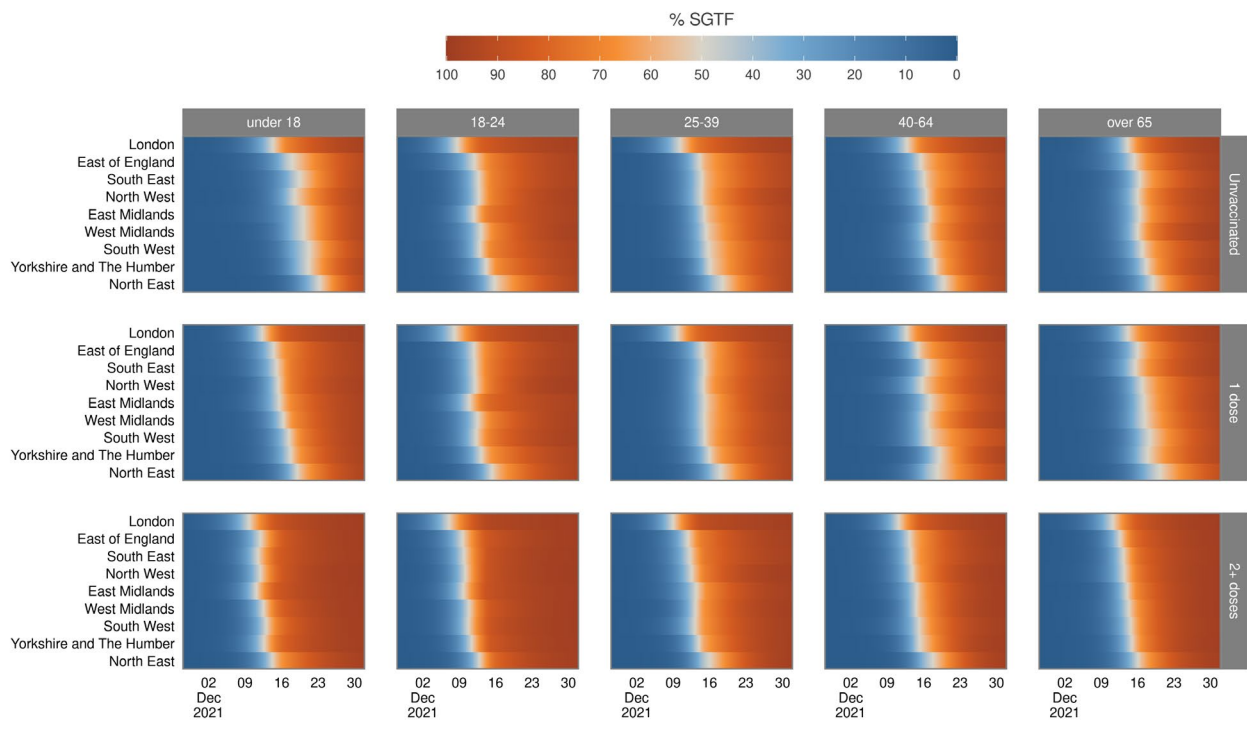

Figure S11: Surfaces showing the % of SGTF tests in each region.

## Supplementary Table

| <i>PARAMETER</i>                                                                                                                                         | <i>PRIOR</i>      | <i>LIMITS</i>     |
|----------------------------------------------------------------------------------------------------------------------------------------------------------|-------------------|-------------------|
| $\sigma_{\alpha^R}, \sigma_{\beta_{T<\tau}^R}, \sigma_{\beta_{T\geq\tau}^R}, \sigma_{\alpha^L}, \sigma_{\beta_{T<\tau}^L}, \sigma_{\beta_{T\geq\tau}^L}$ | normal(0.1, 0.5)  | 0, $\infty$       |
| $\sigma_{\tau^R}, \sigma_{\tau^L}$                                                                                                                       | normal(1.0, 1.0)  | 0, $\infty$       |
| $\alpha$                                                                                                                                                 | normal(0, 0.5)    | $-\infty, \infty$ |
| $\beta_{T<\tau}$                                                                                                                                         | normal(0.45, 0.5) | $-\infty, \infty$ |
| $\beta_{T\geq\tau}$                                                                                                                                      | normal(0.2, 0.5)  | $-\infty, \infty$ |
| $\tau$                                                                                                                                                   | normal(30, 5)     | 0, $\infty$       |

**Table S1.** Priors used for both models.
